# Supplementary material
Source: HighWire-hosted journal article supplement (https://injuryprevention.bmj.com/highwire/filestream/160429/field_highwire_adjunct_files/4/ip-2023-044887supp005_data_supplement.pdf)
Supplement: ip-2023-044887supp005_data_supplement.pdf [file ip-2023-044887supp005_data_supplement.pdf]

Supplementary File 5 – The incidence and severity (Injury Severity Score &gt;15) of all individual activities overall and incidence for male and female participants

| Activities                                                                | Overall |                           | Male  |                           | Female |                           | Severity     |
|---------------------------------------------------------------------------|---------|---------------------------|-------|---------------------------|--------|---------------------------|--------------|
|                                                                           | Cases   | Incidence (95% CI)        | Cases | Incidence                 | Cases  | Incidence                 |              |
| Abseiling                                                                 | 9       | 16.05 (8.35 to 30.85)     |       | *                         |        | *                         | 5 (55.6%)    |
| Angling                                                                   | *       | *                         |       | *                         |        | *                         | *            |
| Badminton                                                                 | 44      | 0.82 (0.61 to 1.10)       | 20    | 3.67 (2.37 to 5.69)       | 24     | 1.13 (0.76 to 1.69)       | 8 (18.2%)    |
| Baseball or Softball                                                      | *       | *                         |       | *                         |        | *                         | *            |
| Basketball                                                                | 29      | 1.54 (1.07 to 2.22)       |       | *                         |        | *                         | 5 (17.2%)    |
| Bowls                                                                     | 9       | 0.43 (0.22 to 0.83)       |       | *                         |        | *                         | *            |
| Boxing (inclusive of boxing fitness classes)                              | 74      | 1.59 (1.27 to 2.00)       |       | *                         |        | *                         | 53 (71.6%)   |
| Canoeing                                                                  | 21      | 2.13 (1.39 to 3.27)       | 15    | 2.46 (2.48 to 4.08)       | 6      | 1.57 (0.71 to 3.49)       | 8 (38.1%)    |
| Cheerleading                                                              | *       | *                         |       | *                         |        | *                         | *            |
| Climbing and bouldering                                                   | 288     | 14.67 (13.07 to 16.47)    | 227   | 17.4 (15.28 to 19.82)     | 61     | 9.25 (7.20 to 11.89)      | 82 (28.5%)   |
| Cricket                                                                   | 48      | 2.59 (1.95 to 3.44)       |       | *                         |        | *                         | 12 (25.0%)   |
| Cycling                                                                   | 1339    | 2.81 (2.66 to 2.96)       | 1215  | 4.04 (3.82 to 4.27)       | 124    | 0.71 (0.60 to 0.85)       | 415 (31.0%)  |
| Dodgeball                                                                 | *       | *                         |       | *                         |        | *                         | 0            |
| Equestrian                                                                | 4303    | 235.28 (228.35 to 242.42) | 768   | 292.79 (272.80 to 314.25) | 3535   | 223.87 (216.61 to 231.37) | 1229 (28.6%) |
| Exercise machines                                                         | 27      | 0.11 (0.08 to 0.16)       | 17    | 0.13 (0.08 to 0.21)       | 10     | 0.09 (0.05 to 0.17)       | 8 (28.6%)    |
| Fitness class                                                             | 42      | 0.10 (0.07 to 0.14)       | 8     | 0.08 (0.04 to 0.16)       | 34     | 0.11 (0.08 to 0.15)       | 6 (14.3%)    |
| Football                                                                  | 876     | 6.56 (6.14 to 7.01)       | 839   | 6.92 (6.47 to 7.40)       | 37     | 2.98 (2.16 to 4.11)       | 174 (19.9%)  |
| Frisbee or ultimate frisbee                                               | *       | *                         |       | *                         |        | *                         | 0            |
| Garden trampolining                                                       | 81      | 6.33 (5.09 to 7.87)       | 51    | 9.99 (7.59 to 13.14)      | 36     | 4.77 (3.44 to 6.61)       | 6 (7.4%)     |
| Gliding, paragliding or hang gliding                                      | 107     | 190.81 (157.87 to 230.62) | 97    | **                        | 10     | **                        | 53 (49.5%)   |
| Golf                                                                      | 75      | 1.25 (1.00 to 1.57)       | 64    | 1.26 (0.99 to 1.61)       | 11     | 1.18 (0.65 to 2.13)       | 18 (24.0%)   |
| Gym session                                                               | 81      | 0.23 (0.18 to 0.29)       | 40    | 0.21 (0.15 to 0.29)       | 41     | 0.25 (0.18 to 0.34)       | 20 (24.7%)   |
| Gymnastics excluding trampolining                                         | 21      | 1.15 (0.75 to 1.76)       | 12    | 1.73 (0.98 to 3.05)       | 9      | 0.79 (0.41 to 1.52)       | *            |
| Gymnastics inclusive of all trampolining                                  | 273     | 14.91 (13.24 to 16.79)    | 179   | 25.87 (22.34 to 29.95)    | 94     | 8.24 (6.73 to 10.09)      | 18 (6.6%)    |
| Gymnastics inclusive of institutional (i.e., non-home based) trampolining | 32      | 1.75 (1.24 to 2.47)       |       | *                         |        | *                         |              |
| Handball                                                                  | *       | *                         |       | *                         |        | *                         | *            |

|                                                                       |     |                           |     |                           |     |                        |             |
|-----------------------------------------------------------------------|-----|---------------------------|-----|---------------------------|-----|------------------------|-------------|
| Hockey                                                                | 31  | 4.61 (3.24 to 6.56)       | 26  | 6.47 (4.41 to 9.50)       | 5   | 1.71 (0.71 to 4.11)    | 14 (45.2%)  |
| Ice hockey                                                            | 5   | 6.92 (2.88 to 16.63)      |     | *                         |     | *                      |             |
| Ice skating                                                           | 113 | 31.74 (26.40 to 38.17)    | 52  | 34.93 (26.62 to 45.84)    | 61  | 29.32 (22.81 to 37.68) | 15 (13.3%)  |
| Judo                                                                  | 9   | 5.48 (2.85 to 10.53)      |     | *                         |     | *                      | *           |
| Lacrosse                                                              | 5   | 4.46 (1.86 to 10.72)      | 5   | **                        | 0   | **                     | *           |
| Martial Arts                                                          | 31  | 2.11 (1.48 to 3.00)       | 31  | 2.91 (2.05 to 4.14)       | 0   | 0                      | 6 (19.4%)   |
| Motor sports                                                          | 597 | 532.31 (491.28 to 576.77) | 555 | 506.30 (465.88 to 550.22) | 42  | **                     | 254 (42.6%) |
| Netball                                                               | 14  | 0.81 (0.48 to 1.37)       |     | *                         |     | *                      | 1 (7.1%)    |
| Obstacle course                                                       | 12  | 12.02 (6.83 to 21.17)     |     | *                         |     | *                      | *           |
| Parkour or free running                                               | 14  | 2.27 (1.34 to 3.83)       |     | *                         |     | *                      | *           |
| Roller skating, inline skating, rollerblading                         | 59  | 22.11 (17.13 to 28.54)    | 30  | 26.78 (18.72 to 38.30)    | 29  | 16.37 (11.38 to 23.56) | *           |
| Rounders                                                              | 5   | 1.02 (0.42 to 2.45)       |     | *                         |     | *                      | 0           |
| Rowing (inclusive of indoor rowing)                                   | *   | *                         |     | *                         |     | *                      | *           |
| Rugby                                                                 | 490 | 25.01 (22.89 to 27.33)    | 462 | 28.14 (25.69 to 30.83)    | 28  | 8.88 (6.13 to 12.86)   | 88 (18.0%)  |
| Running                                                               | 301 | 0.7 (0.63 to 0.78)        | 187 | 0.80 (0.69 to 0.92)       | 114 | 0.58 (0.48 to 0.70)    | 65 (21.6%)  |
| Sailing                                                               | 15  | 1.89 (1.14 to 3.14)       |     | *                         |     | *                      | 7 (46.7%)   |
| Scuba diving or snorkelling                                           | *   | *                         |     | *                         |     | *                      | *           |
| Skateboarding                                                         | 168 | 41.99 (36.10 to 48.84)    | 148 | 48.10 (40.94 to 56.51)    | 20  | 19.69 (12.70 to 30.52) | 50 (29.8%)  |
| Sledding, luge, tobogganing                                           | 28  | 19.97 (13.79 to 28.92)    | 13  | -                         | 15  | 14.95 (9.01 to 24.80)  | *           |
| Sledding, luge, tobogganing (excluding hill or park-based activities) | 19  | 13.59 (8.67 to 21.31)     |     | **                        |     | **                     | *           |
| Snowsport                                                             | 339 | 21.98 (19.76 to 24.45)    | 221 | 23.71 (20.78 to 27.05)    | 14  | 2.30 (1.36 to 3.88)    | 95 (28.0%)  |
| Squash                                                                | 8   | 0.37 (0.19 to 0.74)       |     | *                         |     | *                      | *           |
| Surfing, board surfing, body boarding, kite surfing                   | 47  | 5.61 (4.22 to 7.47)       |     | *                         |     | *                      | 24 (51.1%)  |
| Swimming                                                              | 192 | 0.66 (0.57 to 0.76)       | 133 | 1.04 (0.88 to 1.23)       | 59  | 0.36 (0.28 to 0.46)    | 72 (37.5%)  |
| Table Tennis                                                          | 34  | 1.28 (0.91 to 1.79)       | 15  | 0.80 (0.48 to 1.33)       | 19  | 2.41 (1.54 to 3.78)    | 8 (23.5%)   |
| Taekwondo                                                             | *   | *                         |     | *                         |     | *                      | *           |
| Tai Chi                                                               | *   | *                         |     | *                         |     | *                      | *           |
| Tennis                                                                | 73  | 1.42 (1.13 to 1.79)       | 37  | 1.19 (0.86 to 1.64)       | 36  | 1.77 (1.28 to 2.45)    | 20 (27.4%)  |
| Ten-pin bowling                                                       | 5   | 5.94 (2.47 to 14.27)      |     | *                         |     | *                      |             |
| Track and field athletics                                             | 6   | 0.43 (0.19 to 0.96)       |     | *                         |     | *                      | *           |

|                 |    |                        |    |                     |    |                     |            |
|-----------------|----|------------------------|----|---------------------|----|---------------------|------------|
| Triathlon       | 12 | 8.56 (4.86 to 15.07)   |    | *                   |    | *                   | *          |
| Volleyball      | *  | *                      |    | *                   |    | *                   | 0          |
| Walking         | 49 | 0.02 (0.02 to 0.03)    | 32 | 0.04 (0.03 to 0.06) | 17 | 0.02 (0.01 to 0.03) | 23 (46.9%) |
| Water-skiing    | 21 | 22.21 (14.48 to 34.06) | 15 | **                  | 6  | **                  | 9 (42.9%)  |
| Weights session | 27 | 0.19 (0.13 to 0.28)    | 20 | 0.23 (0.15 to 0.36) | 7  | 0.12 (0.06 to 0.25) | 6 22.2%)   |
| Wrestling       | 5  | 2.97 (1.24 to 7.14)    |    | *                   |    | *                   | *          |
